# Supplementary material for: Annealed binary nanowires: an efficient creation of abundant oxygen deficient states
Source: Royal Society of Chemistry journal article supplement (doi:10.1039/c1jm11546d), 2011-01-01
Supplement: c1jm11546d.pdf [file c1jm11546d.pdf]

## Supporting information

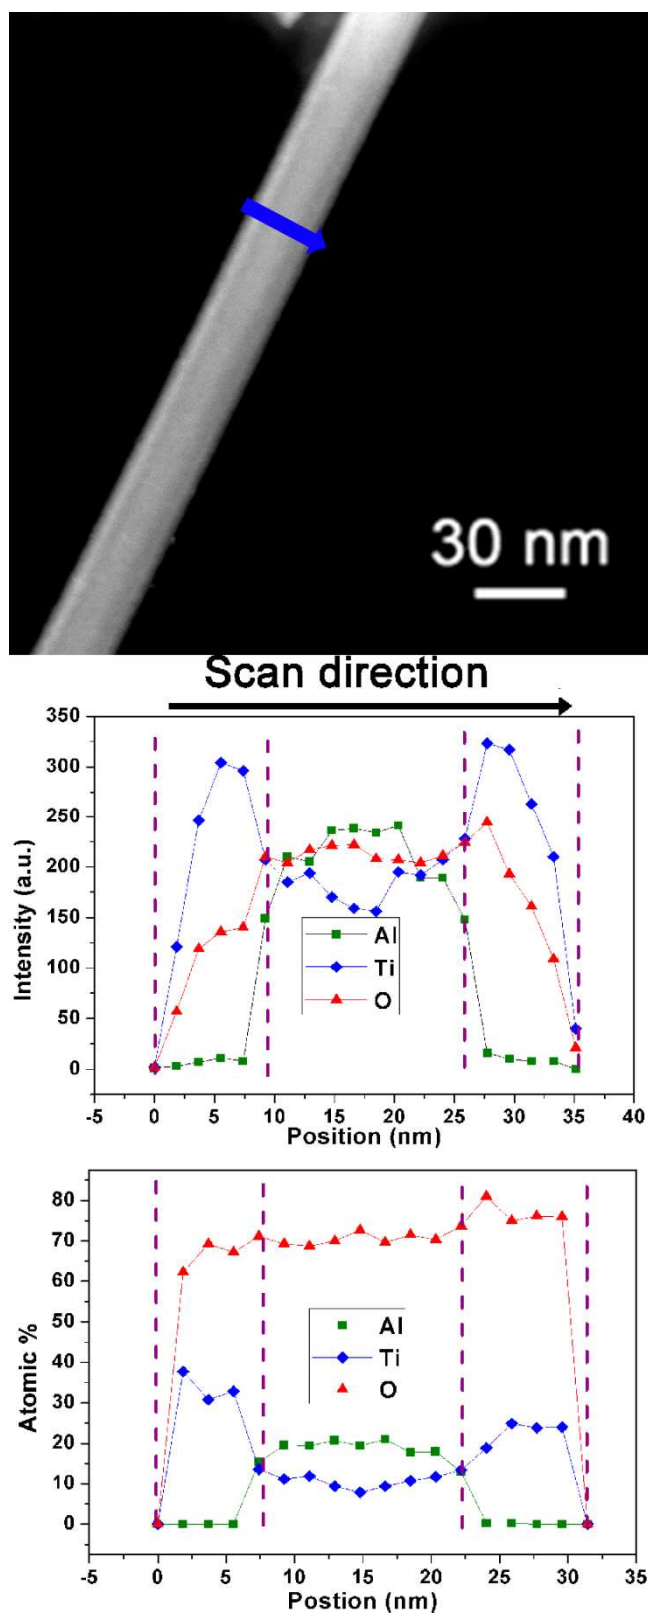

Figure S1. TEM image of a selected nanowire (top), and corresponding STEM-EDX line scan (mid) and energy count in atomic percentage (lower).

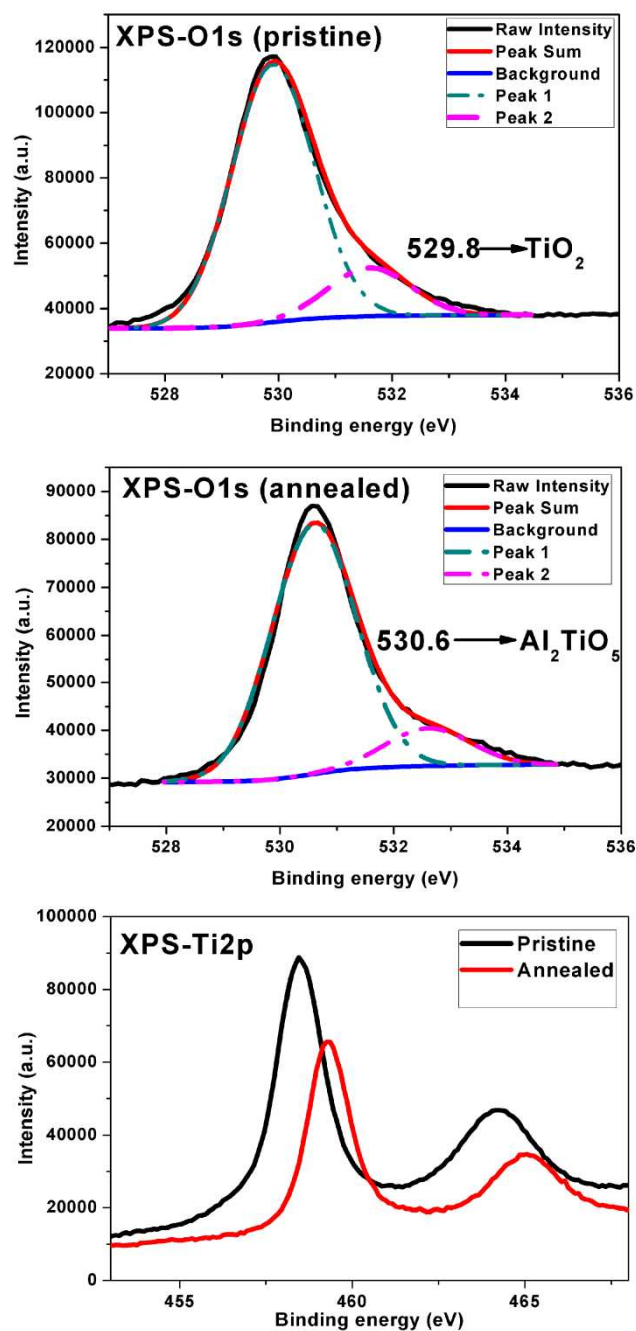

Figure S2. XPS-O1s spectra of pristine (top) and annealed binary nanowires (mid).  
XPS-Ti2p spectra of pristine and annealed binary nanowires (lower).

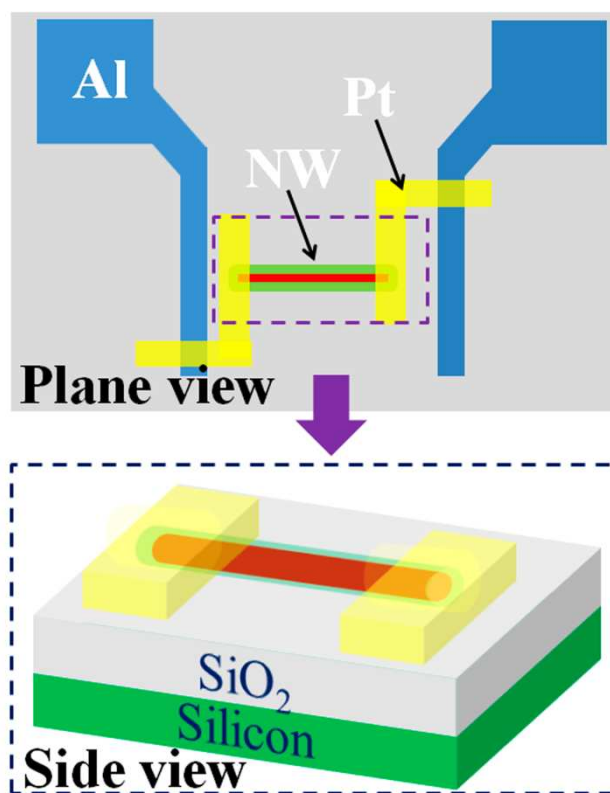

Figure S3. Fabrication schemes of electrical measurements
